# Supplementary material for: Sero and Carriage Epidemiology of Pertussis in Urban and Rural Regions in Vietnam
Source: MDPI journal article supplement (doi:10.3390/vaccines12030225), 2024-02-23
Supplement: s1 [file s1]

Supplementary Table S1. Demographic, clinical, and social characteristics of all the participants and those with anti-PT IgG ≥62.5 IU/ml and crude odds ratios for anti-PT IgG ≥62.5 IU/ml in each characteristic by logistic regression

| Characteristics                                               | Nha Trang in 2017       |                     |                   | Quang Ngai in 2019              |                     |                     |
|---------------------------------------------------------------|-------------------------|---------------------|-------------------|---------------------------------|---------------------|---------------------|
|                                                               | All                     | IgG                 | Crude odds ratio  | All                             | IgG                 | Crude odds ratio    |
|                                                               | Number<br>(%)           | ≥62.5IU/ml<br>N (%) |                   | Number<br>(%)                   | ≥62.5IU/ml<br>N (%) |                     |
|                                                               | n=483                   | n=26                |                   | n=1129                          | n=104               |                     |
| <b>Demographics</b>                                           |                         |                     |                   |                                 |                     |                     |
| Age group                                                     |                         |                     |                   |                                 |                     |                     |
| 3-5                                                           | 73 (15.1)               | 7 (9.6)             | 2.65 (0.75-9.42)  | 182 (16.1)                      | 18 (9.9)            | 1.03 (0.52-2.04)    |
| 6-15                                                          | 107 (22.2)              | 6 (5.6)             | 1.49 (0.41-5.42)  | 299 (26.5)                      | 34 (11.4)           | 1.21 (0.67-2.19)    |
| 16-25                                                         | 105 (21.7)              | 7 (6.7)             | 1.79 (0.51-6.29)  | 158 (14.0)                      | 12 (7.6)            | 0.77 (0.36-1.65)    |
| 26-35                                                         | 94 (19.5)               | 2 (2.1)             | 0.54 (0.10-3.04)  | 292 (25.9)                      | 21 (7.2)            | 0.73 (0.38-1.40)    |
| 36-55                                                         | 104 (21.5)              | 4 (3.9)             | reference         | 198 (17.5)                      | 19 (9.6)            | reference           |
| Sex                                                           |                         |                     |                   |                                 |                     |                     |
| Male                                                          | 207 (42.9)              | 15 (7.3)            | reference         | 558 (49.4)                      | 43 (7.7)            | reference           |
| Female                                                        | 276 (57.1)              | 11 (4)              | 0.53 (0.24-1.18)  | 571 (50.6)                      | 61 (10.7)           | 1.43 (0.95-2.16)    |
| <b>Clinical information: Recent symptoms and medication</b>   |                         |                     |                   |                                 |                     |                     |
| Respiratory symptom                                           | in proceeding two weeks |                     |                   | in proceeding one month, n=1128 |                     |                     |
| Yes                                                           |                         |                     | 3.70 (1.61-8.51)  | 270 (23.9)                      | 28 (10.4)           | 0.84 (0.53-1.33)    |
| No                                                            |                         |                     | reference         | 858 (76.1)                      | 76 (8.9)            | reference           |
| Cough                                                         |                         |                     |                   |                                 |                     |                     |
| Yes                                                           | 60 (12.4)               | 9 (15.0)            | 4.21 (1.79-9.95)  |                                 |                     |                     |
| No                                                            | 423 (87.6)              | 17 (4.0)            | reference         |                                 |                     |                     |
| Runny nose                                                    |                         |                     |                   |                                 |                     |                     |
| Yes                                                           | 58 (12)                 | 4 (6.9)             | 1.36 (0.45-4.09)  |                                 |                     |                     |
| No                                                            | 425 (88)                | 22 (5.2)            | reference         |                                 |                     |                     |
| Difficulty breathing                                          |                         |                     |                   |                                 |                     |                     |
| Yes                                                           | 2 (0.4)                 | 0 (0.0)             | NA                |                                 |                     |                     |
| No                                                            | 481 (99.6)              | 26 (5.4)            |                   |                                 |                     |                     |
| Took antibiotics                                              |                         |                     |                   | in proceeding one month, n=1118 |                     |                     |
| Yes                                                           | 28 (5.8)                | 5 (17.9)            | 4.49 (1.55-12.99) | 211 (18.9)                      | 22 (10.4)           | 0.83 (0.51-1.37)    |
| No                                                            | 455 (94.2)              | 21 (4.6)            | reference         | 907 (81.1)                      | 80 (8.8)            | reference           |
| <b>Clinical information: History and underlying condition</b> |                         |                     |                   |                                 |                     |                     |
| Ever diagnosed with                                           | n=291 (asked in 2019)   |                     |                   | n=1057                          |                     |                     |
| Pertussis                                                     |                         |                     |                   |                                 |                     |                     |
| Yes                                                           | 1 (0.3)                 | 0 (0.0)             | NA                | 3 (0.3)                         | 2 (66.7)            | 20.19 (1.81-224.72) |
| No                                                            | 290 (99.7)              | 12 (4.1)            |                   | 1054 (99.7)                     | 95 (9.0)            | reference           |
| Ever had persistent cough                                     | n=291 (asked in 2019)   |                     |                   | n=1073                          |                     |                     |
| Yes                                                           | 8 (2.8)                 | 0 (0.0)             | NA                | 10 (0.9)                        | 3 (30.0)            | 4.22 (1.07-16.58)   |
| No                                                            | 283 (97.3)              | 12 (4.2)            |                   | 1063 (99.1)                     | 98 (9.2)            | reference           |
| DPT history orally reported                                   |                         |                     |                   |                                 |                     |                     |
| At least one dose                                             | 204 (42.2)              | 12 (5.9)            | 0.37 (0.10-1.39)  |                                 |                     |                     |
| No history or unknown                                         | 279 (57.8)              | 14 (5.0)            | reference         |                                 |                     |                     |

|                                                         |                          |          |                  |             |           |                  |
|---------------------------------------------------------|--------------------------|----------|------------------|-------------|-----------|------------------|
| DPT vaccine history confirmed                           | n=95 (confirmed in 2019) |          |                  | n=291       |           |                  |
| At least one dose                                       | 90 (94.7)                | 5 (5.3)  | NA               | 275 (94.5)  | 30 (10.9) | 0.86 (0.19-3.96) |
| No DPT history                                          | 5 (5.3)                  | 0 (0.0)  |                  | 16 (5.5)    | 2 (12.5)  | reference        |
| Going to nursery or school                              |                          |          |                  |             |           |                  |
| Yes                                                     | 214 (44.3)               | 18 (8.4) | 4.2 (0.82-21.49) | 382 (33.8)  | 42 (11.0) | 1.37 (0.90-2.07) |
| No                                                      | 269 (55.7)               | 8 (3)    | reference        | 748 (66.2)  | 62 (8.3)  | reference        |
| Chronic disease                                         |                          |          |                  |             |           |                  |
| Yes                                                     | 18 (3.7)                 | 1 (5.6)  | 0.81 (0.10-6.51) | 159 (13.7)  | 15 (9.4)  | 1.03 (0.58-1.83) |
| No                                                      | 465 (96.3)               | 25 (5.4) | reference        | 970 (86.3)  | 89 (9.2)  | reference        |
| Smoking                                                 |                          |          |                  |             |           |                  |
| Yes                                                     | 28 (5.8)                 | 2 (7.1)  | 1.71 (0.31-9.39) | 155 (13.7)  | 16 (10.3) | 1.16 (0.66-2.03) |
| No                                                      | 455 (94.2)               | 24 (5.3) | reference        | 974 (86.3)  | 88 (9.0)  | reference        |
| <b>Travel history</b>                                   |                          |          |                  |             |           |                  |
| Traveled to other province in Vietnam since 2012        | n=291 (asked in 2019)    |          |                  | n=1128      |           |                  |
| Yes                                                     | 39 (13.4)                | 2 (5.1)  | 0.86 (0.18-4.21) | 105 (9.3)   | 6 (5.7)   | 1.75 (0.75-4.09) |
| No                                                      | 252 (86.6)               | 10 (4.0) | reference        | 1023 (90.7) | 98 (9.6)  | reference        |
| Traveled to other country since 2012                    | n=291 (asked in 2019)    |          |                  | n=1128      |           |                  |
| Yes                                                     | 6 (2.1)                  | 1 (16.7) | 0.24 (0.02-2.42) | 7 (0.6)     | 0 (0)     | NA               |
| No                                                      | 285 (97.9)               | 11 (3.9) | reference        | 1121 (99.4) | 104 (9.3) |                  |
| <b>Household</b>                                        |                          |          |                  |             |           |                  |
| Family with >4 members                                  |                          |          |                  |             |           |                  |
| ≥5                                                      | 262 (54.2)               | 14 (5.3) | 0.98 (0.44-2.23) | 569 (50.4)  | 55 (9.7)  | 1.12 (0.75-1.67) |
| 1-4                                                     | 221 (45.8)               | 12 (5.4) | reference        | 561 (49.7)  | 49 (8.7)  | reference        |
| Family has child(ren) aged <12 years                    |                          |          |                  |             |           |                  |
| Yes                                                     | 258 (53.4)               | 13 (5.0) | 1.01 (0.44-2.34) | 995 (88.1)  | 94 (9.5)  | 1.30 (0.66-2.57) |
| No                                                      | 225 (46.6)               | 13 (5.8) | reference        | 135 (12)    | 10 (7.4)  | reference        |
| Family has smoker(s)                                    |                          |          |                  | n=1127      |           |                  |
| Yes                                                     | 253 (52.4)               | 15 (5.9) | 1.22 (0.54-2.76) | 659 (58.5)  | 63 (9.6)  | 0.91 (0.60-1.37) |
| No                                                      | 230 (47.6)               | 11 (4.8) | reference        | 468 (41.5)  | 41 (8.8)  | reference        |
| Family has a member with long lasting cough (>3 months) |                          |          |                  |             |           |                  |
| Yes                                                     | 3 (0.6)                  | 0 (0.0)  | NA               |             |           |                  |
| No                                                      | 480 (99.4)               | 26 (5.4) |                  |             |           |                  |
| House size (meter^2)                                    | n=482                    |          |                  | n=490       |           |                  |
| Less than 80                                            | 278 (60.0)               | 12 (4.3) | reference        | 438 (89.4)  | 38 (8.7)  | reference        |
| 81 or more                                              | 204 (40.0)               | 14 (6.9) | 1.73 (0.77-3.88) | 52 (10.6)   | 5 (9.6)   | 1.12 (0.42-2.98) |

PT; pertussis toxin, IgG; immunoglobulin G

Supplementary Table S2. Ratio of anti-PT IgG in 2019 to anti-PT IgG in 2017 and crude coefficient of log-transformed ratio in each demographic, clinical, and social characteristic by linear regression

| Characteristics                                                                                | Number (%) | Ratio of IgG in 2019 to IgG in 2017<br>Geometric mean (95% CI) | Coefficient                 |
|------------------------------------------------------------------------------------------------|------------|----------------------------------------------------------------|-----------------------------|
| <b>All</b>                                                                                     | n=306      | 1.45 (1.29-1.62)                                               | Intercept: 0.37 (0.25-0.48) |
| <b>Demographics</b>                                                                            |            |                                                                |                             |
| Age group (age in 2017)                                                                        |            |                                                                |                             |
| 0-2                                                                                            | 18 (5.9)   | 0.86 (0.48-1.52)                                               | -0.73 (-1.26--0.20)         |
| 3-5                                                                                            | 45 (14.7)  | 1.11 (0.87-1.42)                                               | -0.47 (-0.86--0.09)         |
| 6-15                                                                                           | 65 (21.2)  | 1.72 (1.27-2.33)                                               | -0.04 (-0.38-0.31)          |
| 16-25                                                                                          | 52 (17.0)  | 1.56 (1.11-2.18)                                               | -0.14 (-0.50-0.23)          |
| 26-35                                                                                          | 59 (19.3)  | 1.26 (1.06-1.51)                                               | -0.34 (-0.70-0.01)          |
| 36-55                                                                                          | 67 (21.9)  | 1.78 (1.41-2.25)                                               | reference                   |
| Sex                                                                                            |            |                                                                |                             |
| Male                                                                                           | 128 (41.8) | 1.59 (1.31-1.93)                                               | reference                   |
| Female                                                                                         | 178 (58.2) | 1.35 (1.17-1.56)                                               | -0.16 (-0.40-0.07)          |
| <b>Baseline IgG</b>                                                                            |            |                                                                |                             |
| ≥62.5 IU/ml                                                                                    | 20 (6.5)   | 0.45 (0.29-0.68)                                               | -1.26 (-1.70--0.81)         |
| <62.5 IU/ml                                                                                    | 286 (93.5) | 1.57 (1.40-1.76)                                               | reference                   |
| <b>Clinical information: Symptoms and medication in preceding two weeks in the 2017 survey</b> |            |                                                                |                             |
| Cough                                                                                          |            |                                                                |                             |
| Yes                                                                                            | 46 (15.0)  | 1.79 (1.14-2.81)                                               | 0.25 (-0.07-0.57)           |
| No                                                                                             | 260 (85.0) | 1.39 (1.25-1.56)                                               | reference                   |
| Runny nose                                                                                     |            |                                                                |                             |
| Yes                                                                                            | 45 (14.7)  | 1.44 (1.00-2.09)                                               | -0.00 (-0.33-0.32)          |
| No                                                                                             | 261 (85.3) | 1.45 (1.28-1.63)                                               | reference                   |
| Difficulty breathing                                                                           |            |                                                                |                             |
| Yes                                                                                            | 1 (0.3)    | 3.05 (NA)                                                      | 0.75 (-1.28-2.78)           |
| No                                                                                             | 305 (99.7) | 1.44 (1.28-1.62)                                               | reference                   |
| Took antibiotics                                                                               |            |                                                                |                             |
| Yes                                                                                            | 21 (6.9)   | 1.43 (0.82-2.51)                                               | -0.01 (-0.47-0.45)          |
| No                                                                                             | 285 (93.1) | 1.45 (1.29-1.63)                                               | reference                   |
| <b>Clinical information: History and underlying condition</b>                                  |            |                                                                |                             |
| Ever diagnosed with Pertussis                                                                  |            |                                                                |                             |
| Yes                                                                                            | 1 (0.3)    | 0.79 (NA)                                                      | -0.60 (-2.63-1.43)          |
| No                                                                                             | 305 (99.7) | 1.45 (1.29-1.63)                                               | reference                   |
| Ever had persistent cough                                                                      |            |                                                                |                             |
| Yes                                                                                            | 8 (2.6)    | 2.02 (0.78-5.24)                                               | 0.34 (-0.39-1.07)           |
| No                                                                                             | 298 (97.4) | 1.43 (1.27-1.61)                                               | reference                   |

|                                                         |            |                     |                     |
|---------------------------------------------------------|------------|---------------------|---------------------|
| DPT history orally reported                             |            |                     |                     |
| At least one dose                                       | 146 (47.7) | 1.36 (1.13-1.63)    | -0.12 (-0.35-0.11)  |
| No history or unknown                                   | 160 (52.3) | 1.53 (1.32-1.78)    | reference           |
| DPT vaccine history confirmed                           |            |                     |                     |
| At least one dose                                       | 104 (94.6) | 1.23 (1.01-1.50)    | -1.10 (-1.98--0.22) |
| No history                                              | 6 (5.5)    | 3.71 (0.58-23.87)   | reference           |
| Going to nursery or school                              |            |                     |                     |
| Yes                                                     | 140 (45.8) | 1.35 (1.13-1.62)    | -0.12 (-0.35-0.11)  |
| No                                                      | 166 (54.3) | 1.53 (1.32-1.78)    | reference           |
| Chronic disease                                         |            |                     |                     |
| Yes                                                     | 10 (3.3)   | 1.52 (0.90-2.58)    | 0.05 (-0.60-0.71)   |
| No                                                      | 296 (96.7) | 1.44 (1.28-1.63)    | reference           |
| Smoking                                                 |            |                     |                     |
| Yes                                                     | 19 (6.2)   | 2.06 (1.29-3.29)    | 0.38 (-0.10-0.86)   |
| No                                                      | 287 (93.8) | 1.41 (1.25-1.59)    | reference           |
| <b>Travel history</b>                                   |            |                     |                     |
| Traveled to other province in Vietnam since 2012        |            |                     |                     |
| Yes                                                     | 41 (13.4)  | 1.22 (0.98-1.51)    | 0.20 (-0.14-0.54)   |
| No                                                      | 265 (86.6) | 1.48 (1.30-1.69)    | reference           |
| Traveled to other country since 2012                    |            |                     |                     |
| Yes                                                     | 7 (2.3)    | 1.13 (0.57-2.22)    | 0.25 (-0.52-1.03)   |
| No                                                      | 299 (97.7) | 1.45 (1.29-1.64)    | reference           |
| <b>Household</b>                                        |            |                     |                     |
| Family with >4 members                                  |            |                     |                     |
| ≥5                                                      | 170 (55.6) | 1.38 (1.19-1.60)    | -0.10 (-0.33-0.13)  |
| 1-4                                                     | 136 (44.4) | 1.53 (1.27-1.84)    | reference           |
| Family has child(ren) aged <12 years                    |            |                     |                     |
| Yes                                                     | 170 (55.6) | 1.39 (1.21-1.61)    | -0.09 (-0.32-0.15)  |
| No                                                      | 136 (44.4) | 1.52 (1.25-1.83)    | reference           |
| Family has smoker(s)                                    |            |                     |                     |
| Yes                                                     | 162 (52.9) | 1.35 (1.16-1.57)    | -0.14 (-0.38-0.09)  |
| No                                                      | 144 (47.1) | 1.56 (1.30-1.87)    | reference           |
| Family has a member with long lasting cough (>3 months) |            |                     |                     |
| Yes                                                     | 2 (0.7)    | 3.04 (0.00-2062.88) | 0.75 (-0.69-2.19)   |
| No                                                      | 304 (99.4) | 1.44 (1.28-1.62)    | reference           |
| House size (meter^2) (n=482)                            |            |                     |                     |
| Less than 80                                            | 173 (56.7) | 1.35 (1.17-1.57)    | reference           |
| 81 or more                                              | 132 (43.3) | 1.58 (1.31-1.90)    | 0.15 (-0.08-0.39)   |

PT; pertussis toxin, IgG; immunoglobulin G, DPT; diphtheria-pertussis-tetanus vaccine

Supplementary Table S3. Ratio of anti-PT IgG in 2019 to anti-PT IgG in 2017 and crude and adjusted coefficient of the ratio in each demographic, clinical, and social characteristic by linear regression

| Characteristics                                                                                | Number (%) | Coefficient                 | Adjusted coefficient*        |
|------------------------------------------------------------------------------------------------|------------|-----------------------------|------------------------------|
| <b>All</b>                                                                                     | n=306      | Intercept: 3.37 (2.22-4.51) | Intercept: 6.14 (1.62-10.65) |
| <b>Demographics</b>                                                                            |            |                             |                              |
| Age group (age in 2017)                                                                        |            |                             |                              |
| 0-2                                                                                            | 18 (5.9)   | -1.79 (-7.08-3.50)          | -2.23 (-7.56-3.09)**         |
| 3-5                                                                                            | 45 (14.7)  | -1.82 (-5.66-2.02)          | -1.91 (-5.75-1.93)**         |
| 6-15                                                                                           | 65 (21.2)  | 2.29 (-1.18-5.76)           | 2.10 (-1.38-5.58)**          |
| 16-25                                                                                          | 52 (17.0)  | 0.44 (-3.25-4.12)           | 0.38 (-3.30-4.06)**          |
| 26-35                                                                                          | 59 (19.3)  | -1.99 (-5.55-1.57)          | -1.78 (-5.35-1.79)**         |
| 36-55                                                                                          | 67 (21.9)  | reference                   | Reference                    |
| Sex                                                                                            |            |                             |                              |
| Male                                                                                           | 128 (41.8) | reference                   | Reference                    |
| Female                                                                                         | 178 (58.2) | -1.83 (-4.14-0.49)          | -1.62 (-3.99-0.74)***        |
| <b>Baseline IgG</b>                                                                            |            |                             |                              |
| ≥62.5 IU/ml                                                                                    | 20 (6.5)   | -2.94 (-7.57-1.68)          | -2.40 (-7.42-2.61)           |
| <62.5 IU/ml                                                                                    | 286 (93.5) | reference                   | reference                    |
| <b>Clinical information: Symptoms and medication in preceding two weeks in the 2017 survey</b> |            |                             |                              |
| Cough                                                                                          |            |                             |                              |
| Yes                                                                                            | 46 (15.0)  | 5.49 (2.35-8.64)            | 6.25 (3.01-9.49)             |
| No                                                                                             | 260 (85.0) | reference                   | reference                    |
| Runny nose                                                                                     |            |                             |                              |
| Yes                                                                                            | 45 (14.7)  | 3.16 (-0.05-6.38)           | 3.89 (0.50-7.28)             |
| No                                                                                             | 261 (85.3) | reference                   | reference                    |
| Difficulty breathing                                                                           |            |                             |                              |
| Yes                                                                                            | 1 (0.3)    | -0.32 (-20.39-19.76)        | -1.91 (-22.09-18.26)         |
| No                                                                                             | 305 (99.7) | reference                   | reference                    |
| Took antibiotics                                                                               |            |                             |                              |
| Yes                                                                                            | 21 (6.9)   | 0.86 (-3.68-5.39)           | 0.85 (-3.78-5.48)            |
| No                                                                                             | 285 (93.1) | reference                   | reference                    |
| <b>Clinical information: History and underlying condition</b>                                  |            |                             |                              |
| Ever diagnosed with Pertussis                                                                  |            |                             |                              |
| Yes                                                                                            | 1 (0.3)    | -2.58 (-22.66-17.49)        | -0.38 (-20.5-19.74)          |
| No                                                                                             | 305 (99.7) | reference                   | reference                    |
| Ever had persistent cough                                                                      |            |                             |                              |
| Yes                                                                                            | 8 (2.6)    | 1.48 (-5.70-8.66)           | 1.86 (-5.41-9.12)            |
| No                                                                                             | 298 (97.4) | reference                   | reference                    |

|                                                         |            |                      |                       |  |
|---------------------------------------------------------|------------|----------------------|-----------------------|--|
| DPT history orally reported                             |            |                      |                       |  |
| At least one dose                                       | 146 (47.7) | 1.18 (−1.11-3.47)    | 1.93 (−1.69-5.54)     |  |
| No history or unknown                                   | 160 (52.3) | reference            | reference             |  |
| DPT vaccine history confirmed                           |            |                      |                       |  |
| At least one dose                                       | 104 (94.6) | −20.76 (−31.5−10.02) | −24.34 (−35.44−13.23) |  |
| No history                                              | 6 (5.5)    | reference            | reference             |  |
| Going to nursery or school                              |            |                      |                       |  |
| Yes                                                     | 140 (45.8) | 0.93 (−1.37-3.23)    | −1.05 (−5.38-3.29)    |  |
| No                                                      | 166 (54.3) | reference            | reference             |  |
| Chronic disease                                         |            |                      |                       |  |
| Yes                                                     | 10 (3.3)   | −1.33 (−7.77-5.12)   | −2.05 (−8.53-4.42)    |  |
| No                                                      | 296 (96.7) | reference            | reference             |  |
| Smoking                                                 |            |                      |                       |  |
| Yes                                                     | 19 (6.2)   | 0.53 (−4.22-5.28)    | −0.33 (−5.61-4.95)    |  |
| No                                                      | 287 (93.8) | reference            | reference             |  |
| <b>Travel history</b>                                   |            |                      |                       |  |
| Traveled to other province in Vietnam since 2012        |            |                      |                       |  |
| Yes                                                     | 41 (13.4)  | 2.14 (−1.22-5.49)    | 2.02 (−1.37-5.42)     |  |
| No                                                      | 265 (86.6) | reference            | reference             |  |
| Traveled to other country since 2012                    |            |                      |                       |  |
| Yes                                                     | 7 (2.3)    | 2.05 (−5.61-9.71)    | 1.70 (−6.02-9.43)     |  |
| No                                                      | 299 (97.7) | reference            | reference             |  |
| <b>Household</b>                                        |            |                      |                       |  |
| Family with >4 members                                  |            |                      |                       |  |
| ≥5                                                      | 170 (55.6) | −0.53 (−2.84-1.77)   | −0.21 (−2.56-2.15)    |  |
| 1-4                                                     | 136 (44.4) | reference            | reference             |  |
| Family has child(ren) aged <12 years                    |            |                      |                       |  |
| Yes                                                     | 170 (55.6) | −0.47 (−2.77-1.84)   | 0.43 (−2.09-2.95)     |  |
| No                                                      | 136 (44.4) | reference            | reference             |  |
| Family has smoker(s)                                    |            |                      |                       |  |
| Yes                                                     | 162 (52.9) | −1.56 (−3.85-0.73)   | −1.50 (−3.82-0.81)    |  |
| No                                                      | 144 (47.1) | reference            | reference             |  |
| Family has a member with long lasting cough (>3 months) |            |                      |                       |  |
| Yes                                                     | 2 (0.7)    | 0.08 (−14.14-14.30)  | −3.31 (−17.68-11.05)  |  |
| No                                                      | 304 (99.4) | reference            | reference             |  |
| House size (meter^2) (n=482)                            |            |                      |                       |  |
| Less than 80                                            | 173 (56.7) | reference            | reference             |  |
| 81 or more                                              | 132 (43.3) | 0.66 (−1.66-2.98)    | 0.50 (−1.84-2.84)     |  |

PT; pertussis toxin, IgG; immunoglobulin G, DPT; diphtheria-pertussis-tetanus vaccine

\* adjusted by sex and age group

\*\* adjusted by sex

\*\*\* adjusted by age group
